# Supplementary material
Source: PubMed Central journal article supplement (PMC4006830)
Supplement: NIHMS570160-supplement-Fig__1___Legend.pdf [file NIHMS570160-supplement-Fig__1___Legend.pdf]

# Supplementary Figure 1

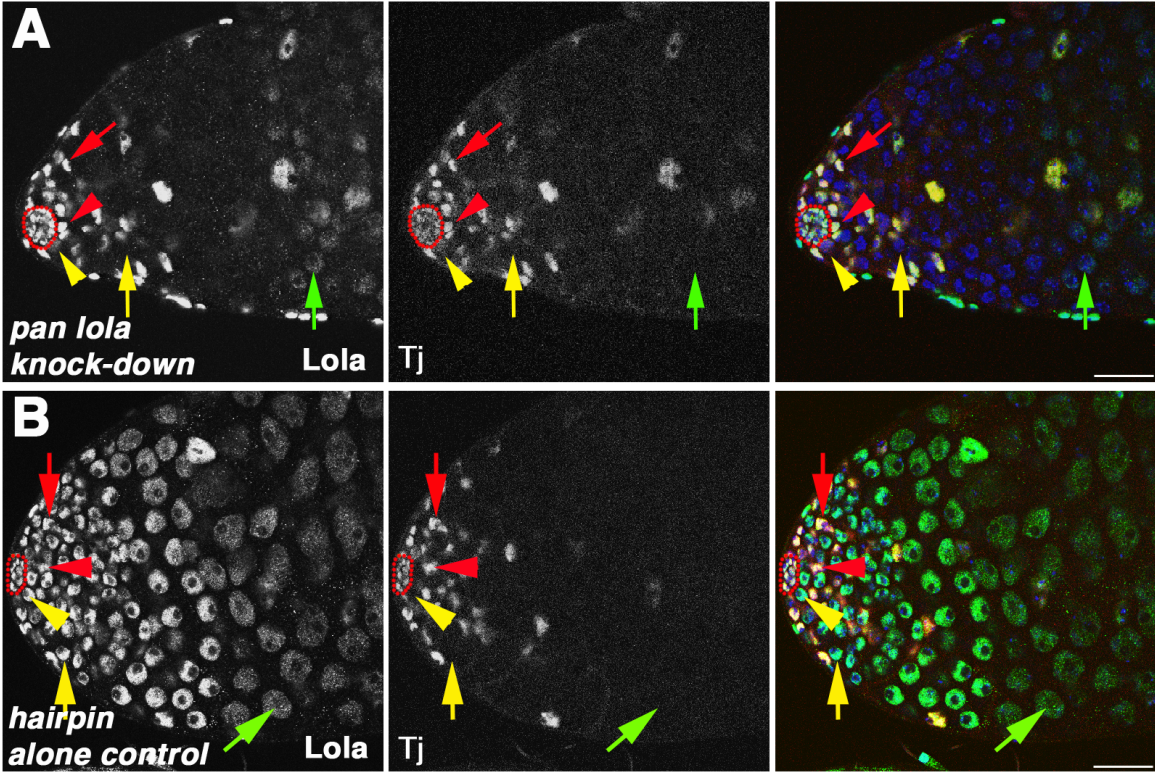

**Supplementary Figure 1: Lola protein was not detected in GSCs and early germ cells in *pan-lola* knock-down testes**

**A:** *pan lola* knock-down testis (*w, UAS-dcr-2; UAS- lola RNAi/+; UAS- lola RNAi/NG4VP16*) and **B:** hairpin alone testis (*w, UAS-dcr-2; UAS- lola RNAi/+; UAS-lola RNAi/+*) costained with antibodies against the Lola common domain and Tj. Red: Tj, somatic nuclei. Green: Lola. Blue: DAPI. Red outlines: hub. Yellow arrowheads: GSCs. Yellow arrows: spermatogonia. Red arrowheads: CySCs. Red arrows: Cyst cells. Green arrowheads: Spermatocytes. Scale bar: 25  $\mu$ m.
